# Supplementary material for: Bird-like spiro-metallacyclic complexes based on a bent oxadiazole bridging ligand
Source: Royal Society of Chemistry journal article supplement (doi:10.1039/b818753n), 2009-01-01
Supplement: b818753n.pdf [file b818753n.pdf]

# Supporting Information for

## Birdlike Spiro-Metallacyclic Complexes Based on Bent Oxadiazole Bridging Ligand

**Xia-Xia Zhao, Jian-Ping Ma, Da-Zhong Shen, Yu-Bin Dong,<sup>\*</sup> and Ru-Qi Huang**

*College of Chemistry, Chemical Engineering and Materials Science, Key Lab of Molecular and Nano Probe, Engineering Research Center of Pesticide and Medicine Intermediate Clean Production, Ministry of Education, Shandong Normal University, Jinan, 250014, P. R. China.*  
Email: [yubindong@sdnu.edu.cn](mailto:yubindong@sdnu.edu.cn)

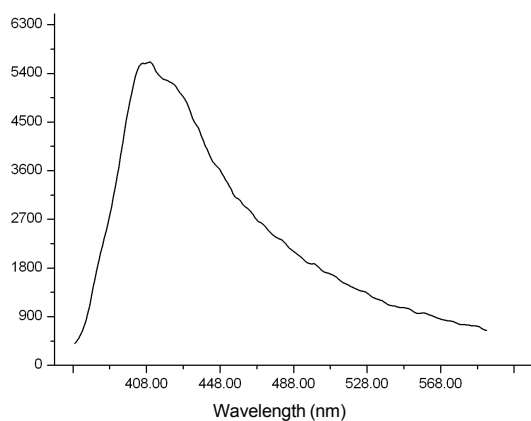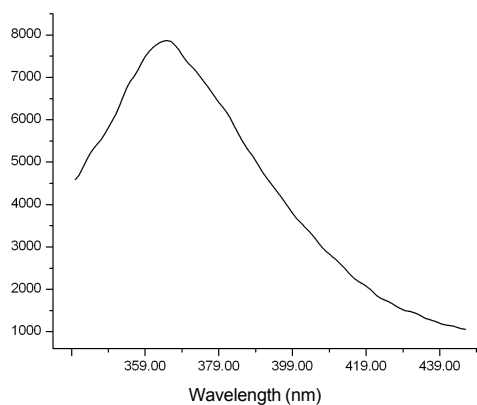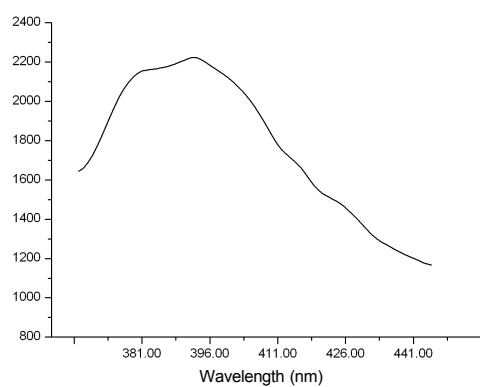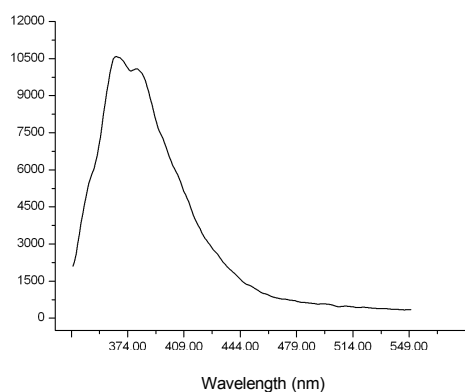

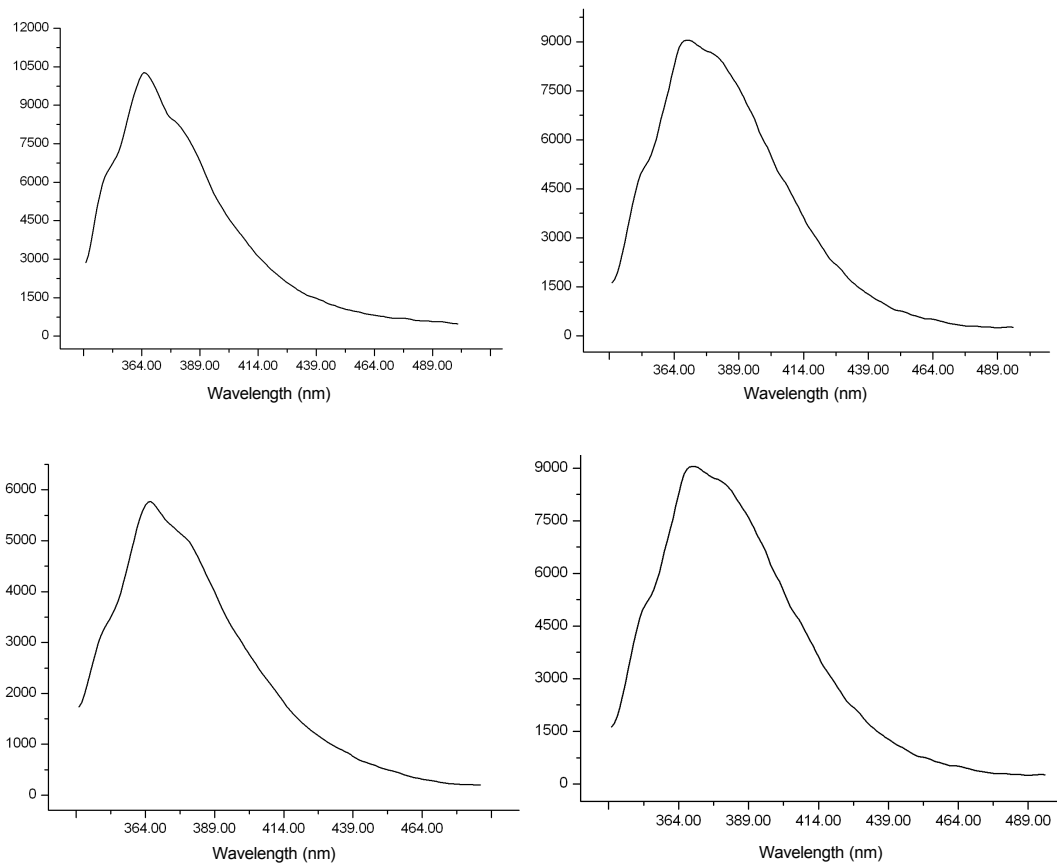

**Figure S1.** The solid state emission spectra of **1-8**.
